# Supplementary material for: Analytical expressions for the disjoining pressure between particle-stabilized fluid–fluid interfaces and composite materials
Source: Royal Society of Chemistry journal article supplement (doi:10.1039/c2sm07307b), 2012-01-01
Supplement: c2sm07307b.pdf [file c2sm07307b.pdf]

## Supplementary Information

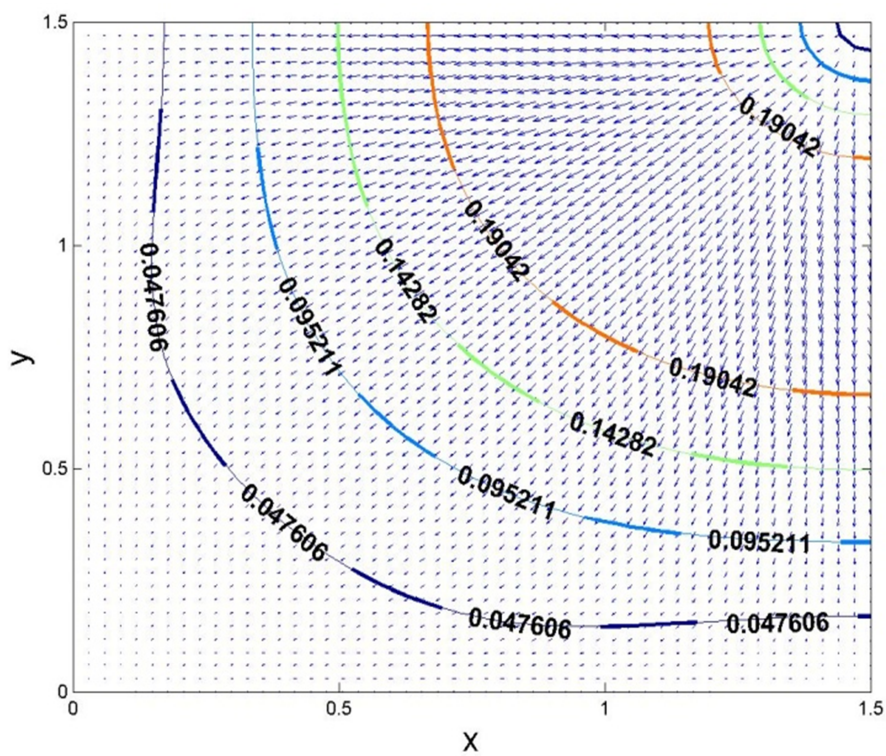

Fig. 1. Vector plot and level curves of the force magnitude in pN on the *reference* particle, changing the relative position with respect to the facing layer unit cell;  $a=3\text{nm}$ ,  $R_p=1\text{nm}$  and  $D=2.5\text{nm}$ , i.e. the facing lattice has its particles positioned in the lattice sites  $(0\text{nm},0\text{nm})$   $(0\text{nm},3\text{nm})$   $(3\text{nm},0\text{nm})$   $(3\text{nm},3\text{nm})$ . The vector plot is in logarithmic scale. Only one quarter of a unit cell is represented:  $(0,0)$  is the lattice site;  $(1.5,1.5)$  is the cell centre

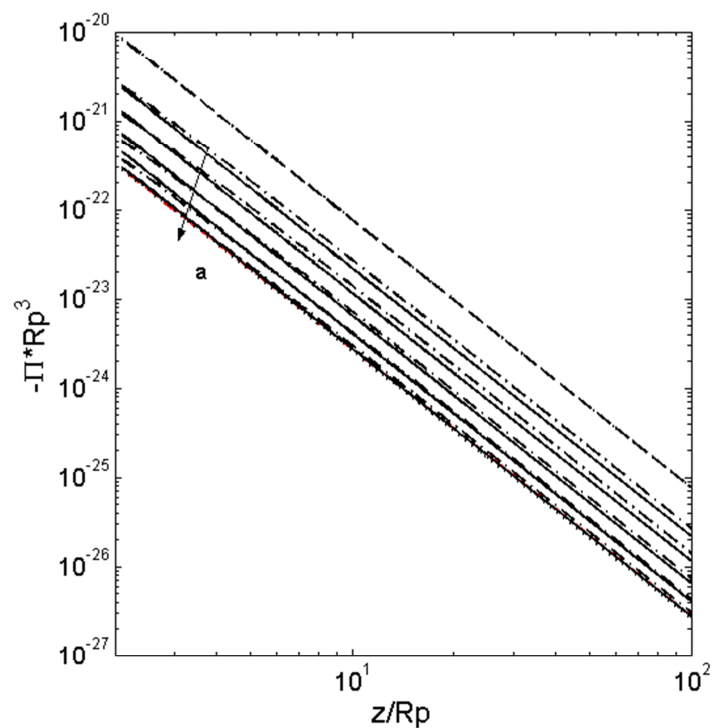

Fig. 2.  $\Pi$  (expressed in J) between two half spaces of PBd interacting across void, with dielectric particles as inclusions arranged in an SC lattice,  $a = [4R_p; 3R_p; 2.4R_p]$  and  $\epsilon_{p3} = 6$ . System without inclusions (dotted curves); two half spaces with  $\epsilon_{p3} = 6$  interacting across void (dashed curves). The solid curves are obtained using the EMT method; the dashdotted curves are obtained using the proposed approach.

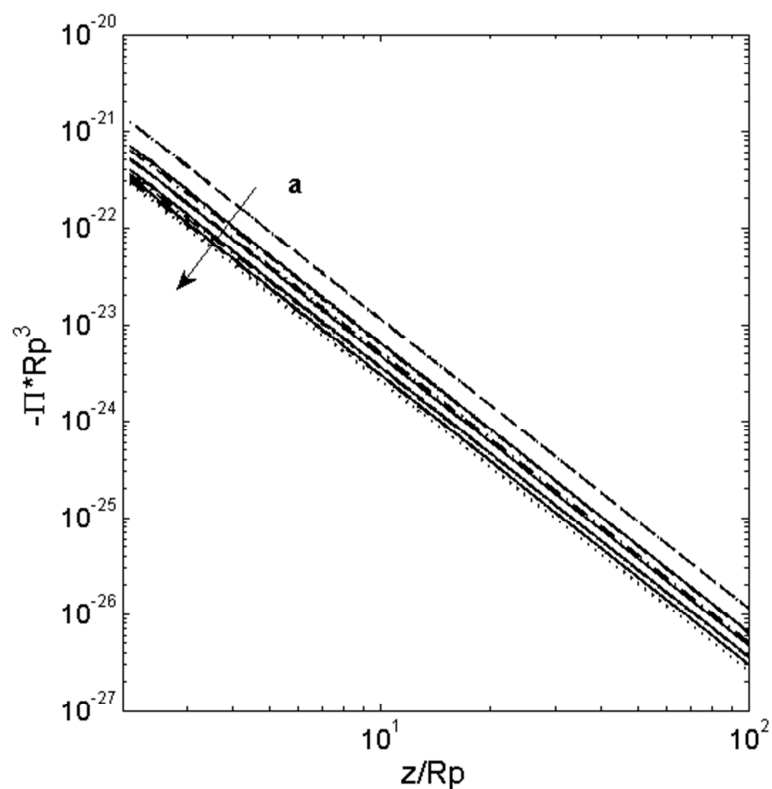

**Fig. 3.**  $\Pi$  (expressed in J) of two PBd infinite half spaces, interacting across void, with dielectric particles as inclusions arranged in an SC lattice,  $a = [4R_p; 3R_p; 2.4R_p]$ , and  $\epsilon_{p2} = 2$  (solid curves). System without inclusions (dotted curves); two infinite half spaces with  $\epsilon_{p2} = 2$  in void (dashed curves). The solid curves are obtained using the EMT approach; the dashdotted curves are obtained using the proposed approach.

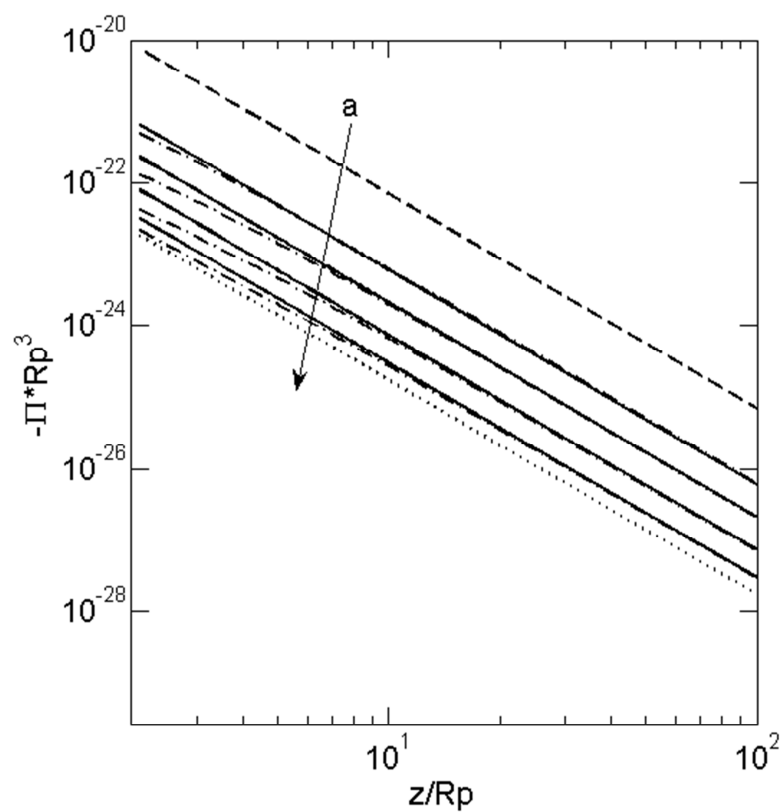

**Fig. 4.**  $\Pi$  (expressed in J) for two PBd infinite half spaces with dielectric particles as inclusions interacting across PDMS. The inclusions are arranged in an SC lattice,  $a = [4R_p; 3R_p; 2.4R_p]$ . System without inclusions (dotted curves), two infinite half spaces with  $\epsilon_{p3} = 6$  interacting across PDMS (dashed curves). The solid curves are obtained using the EMT approach; the dashdotted curves are obtained using the proposed approach.

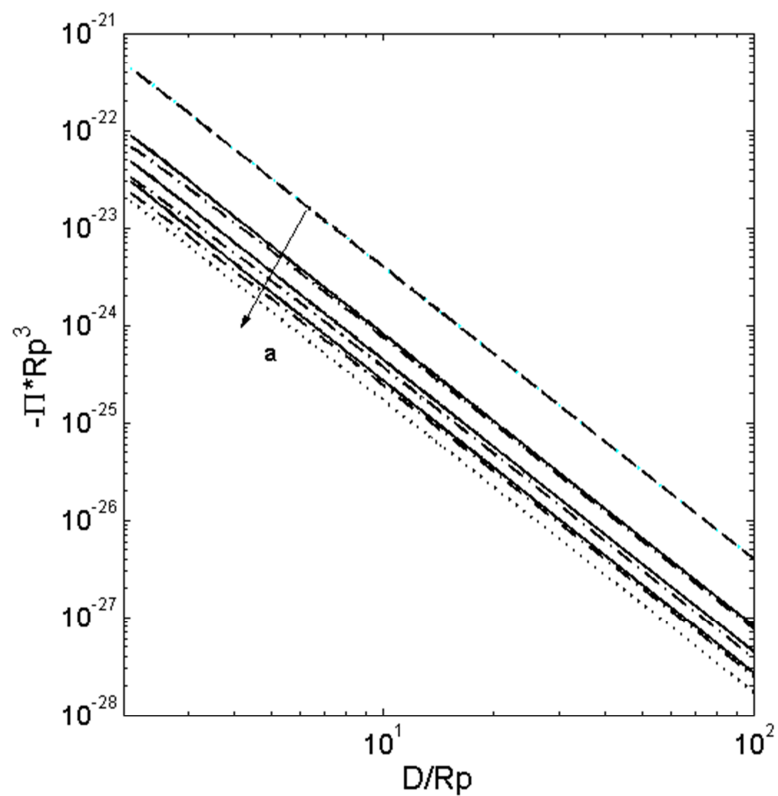

**Fig. 5.**  $\Pi$  (expressed in J) for two PBd infinite half spaces interacting across PDMS, with dielectric particles as inclusions arranged in an SC lattice,  $a = [4R_p; 3R_p; 2.4R_p]$ ,  $\epsilon_{p2} = 2$  (solid curves); system without inclusions (dotted curves); two infinite half spaces with  $\epsilon_{p2} = 2$  interacting across PDMS (dashed curves). The solid curves are obtained using the EMT approach, the dashdotted curves are obtained using the proposed approach.

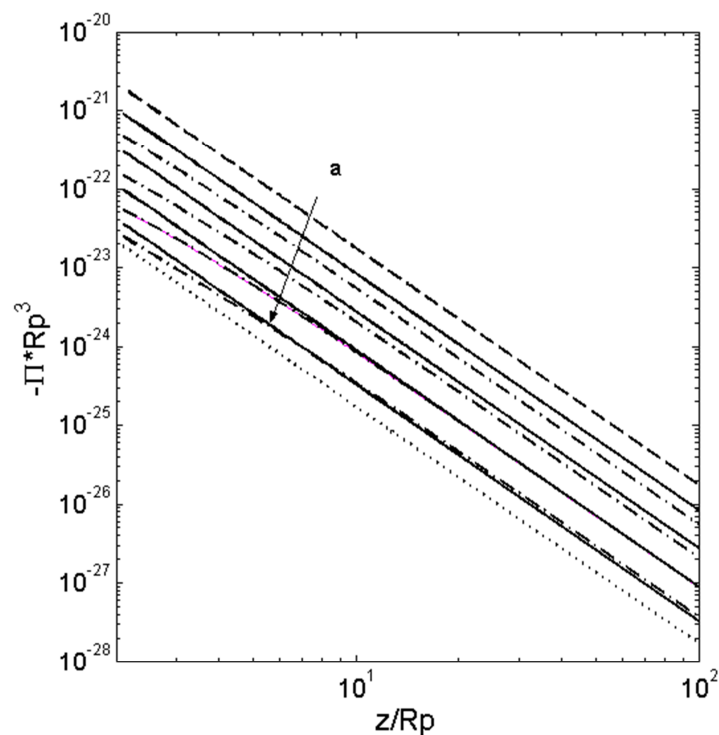

**Fig. 6.**  $\Pi$  (expressed in J) of two PBd infinite half spaces interacting across PDMS, with Au particles inclusions arranged in an SC lattice,  $a = [6Rp; 4Rp; 3Rp; 2.4Rp]$  (solid curves); polymeric system with no inclusions (dotted curves), two infinite gold half spaces interacting across PDMS (dashed curves).  $A_{Au/PBd/Au} = 2.99 \times 10^{-19} \text{ J}$  was evaluated with the Bruminger method,  $A_{Au/PDMS/PBd} = 9.69 \times 10^{-20} \text{ J}$ , was determined as a fitting parameter. The black solid curves are obtained using the EMT approach, the dashdotted curves are obtained using the proposed approach.
